# Supplementary material
Source: PubMed Central journal article supplement (PMC4048763)
Supplement: NIHMS588461-supplement-1.pdf [file NIHMS588461-supplement-1.pdf]

Supplemental Figure 1

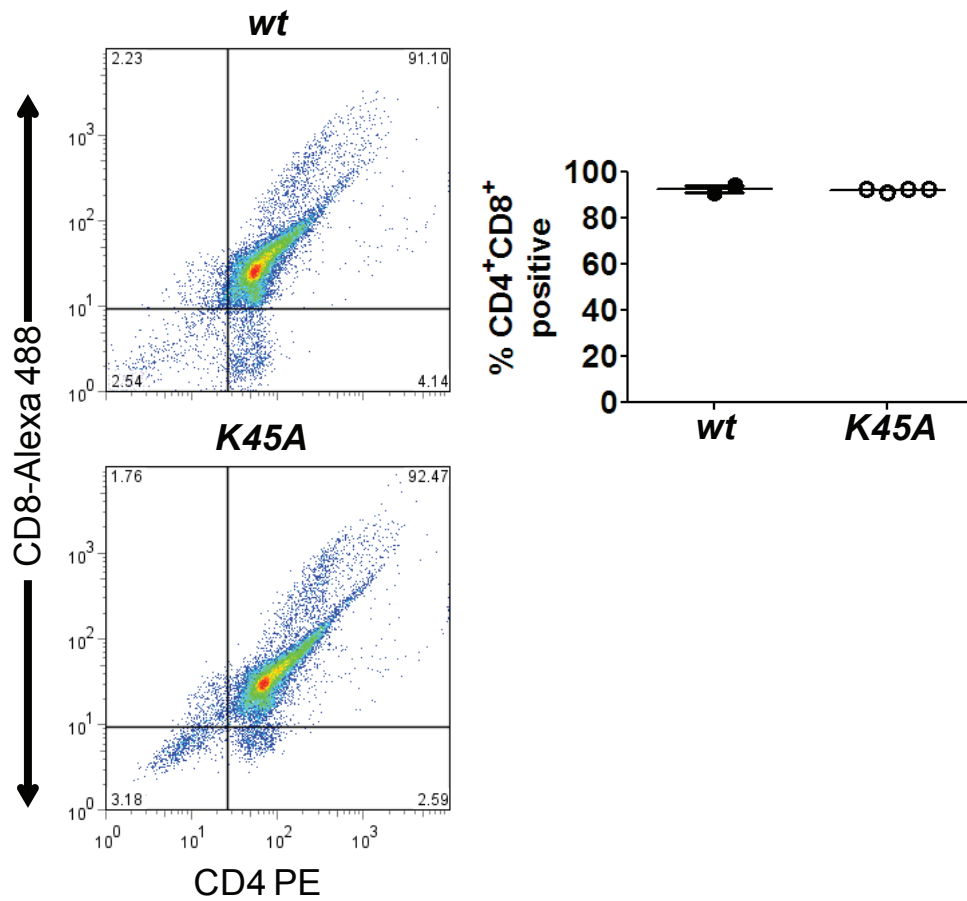

Flow cytometry analysis of double positive T cells in the thymus of *wt* littermate and *Ripkl*<sup>K45A</sup> mice. Cells were gate on CD3 positive cells and then analyzed for CD8 and CD4 expression. Data are representative of 2 independent experiments.

Supplemental Figure 2

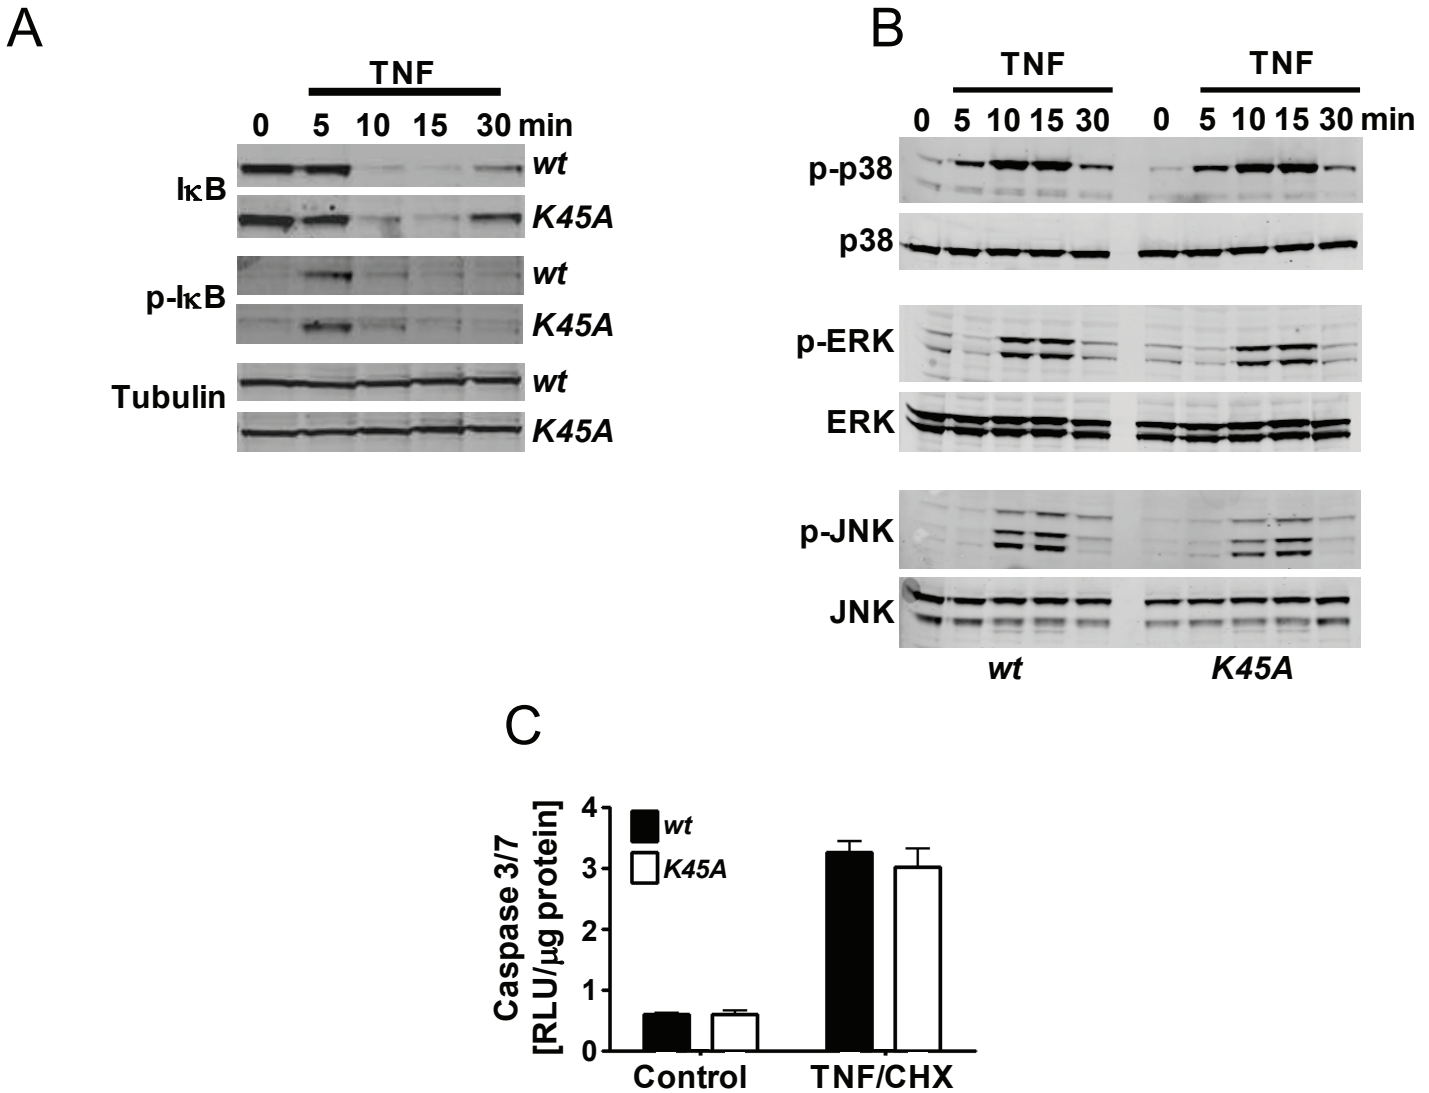

(A) Western blot analysis of IκB degradation and phosphorylation in BMDM isolated from *wt* or *Ripk1*<sup>K45A</sup> mice. Tubulin is shown as a loading control. All displayed data are representative of at least 3 independent experiments, each containing cells from at least 2 individual animals per group. (B) TNF-driven p38, ERK and JNK activation is independent of RIP1 kinase activity. Western blot analysis of p38, ERK and JNK phosphorylation in BMDM isolated from *wt* littermate or *Ripk1*<sup>K45A</sup> mice in response to TNF stimulation. Western blots with total p38, ERK and JNK levels are shown for comparison. All displayed data are representative of at least 3 independent experiments, each containing at least 2 animals per group. (C) Caspase 3/7 analysis of BMDM from *wt* (black bars) or *Ripk1*<sup>K45A</sup> (white bars) mice. Cells were evaluated 6 hours post TNF and CHX treatment.
